# Supplementary material for: Facile synthesis of supported RuO2·xH2O nanoparticles on Co–Al hydrotalcite for the catalytic oxidation of alcohol: effect of temperature pretreatment
Source: Royal Society of Chemistry journal article supplement (doi:10.1039/c6ra11167j), 2016-01-01
Supplement: c6ra11167j1.pdf [file c6ra11167j1.pdf]

## Supporting Information for

# Facile synthesis of supported $\text{RuO}_2 \cdot x\text{H}_2\text{O}$ nanoparticles on Co-Al hydrotalcite for catalytic oxidation of alcohol: effect of the temperature pretreatments

Na Zhang, Yiyun Du, Min Yin, Chaoyang Guan, Junting Feng\* and Dianqing Li

State Key Laboratory of Chemical Resource Engineering

Beijing University of Chemical Technology, Beijing 100029, China

\* Corresponding author. Tel.: +86 10 64451007 Fax: +86 10 64425385.

E-mail address: [fengjt@mail.buct.edu.cn](mailto:fengjt@mail.buct.edu.cn) (J. T. Feng)

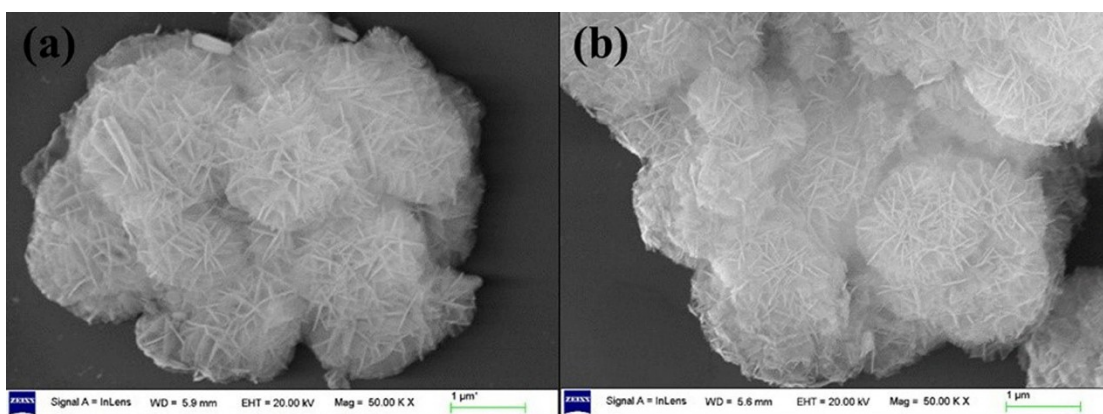

**Fig. S1** SEM images of RuO<sub>2</sub>/CoAl-LDH<sub>CP</sub> (a) and RuO<sub>2</sub>/CoAl-LDH<sub>DP</sub> (b)

**Table S1.** The XPS Ru 3p<sub>3/2</sub> results of RuO<sub>2</sub>/CoAl-LDH<sub>CP</sub> and RuO<sub>2</sub>/CoAl-LDH<sub>DP</sub> catalysts

| Catalyst                                 | Ru 3p <sub>3/2</sub>                |            |      |              |
|------------------------------------------|-------------------------------------|------------|------|--------------|
|                                          | Compound Type                       | B. E. (eV) | FWHM | Fraction (%) |
| RuO <sub>2</sub> /CoAl-LDH <sub>DP</sub> | RuO <sub>2</sub> ·xH <sub>2</sub> O | 464.9      | 3.61 | 36.6         |
|                                          | RuO <sub>2</sub>                    | 462.9      | 3.42 | 63.4         |
| RuO <sub>2</sub> /CoAl-LDH <sub>CP</sub> | RuO <sub>2</sub> ·xH <sub>2</sub> O | 464.7      | 3.61 | 34.84        |
|                                          | RuO <sub>2</sub>                    | 462.7      | 3.42 | 65.16        |

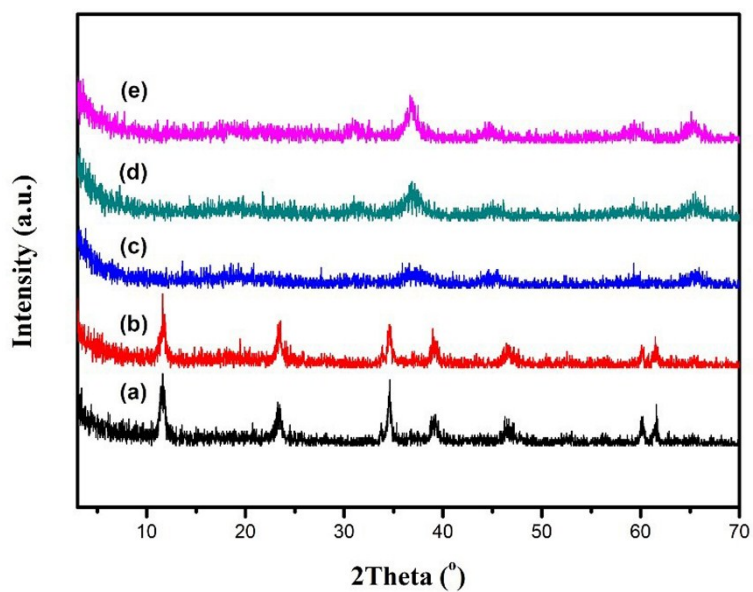

**Fig. S2** XRD patterns of RuO<sub>2</sub>/CoAl-LDH<sub>CP</sub> (a), RuO<sub>2</sub>/CoAl-LDH<sub>CP</sub>-110°C (b), RuO<sub>2</sub>/CoAl-LDH<sub>CP</sub>-200°C (c), RuO<sub>2</sub>/CoAl-LDH<sub>CP</sub>-300°C (d), RuO<sub>2</sub>/CoAl-LDH<sub>CP</sub>-500°C (e)

**Table S2.** The XPS results of several catalysts with different pretreated temperature

| Catalyst                                        | Co 2p <sub>3/2</sub> |            |      |              | Ru 3p <sub>3/2</sub>                |            |      |              |
|-------------------------------------------------|----------------------|------------|------|--------------|-------------------------------------|------------|------|--------------|
|                                                 | Compound Type        | B. E. (eV) | FWHM | Fraction (%) | Compound Type                       | B. E. (eV) | FWHM | Fraction (%) |
| RuO <sub>2</sub> /CoAl-LDH <sub>CP</sub>        | Co <sup>2+</sup>     | 780.4      | 2.69 | 50.35        | RuO <sub>2</sub> ·xH <sub>2</sub> O | 462.7      | 3.42 | 34.84        |
|                                                 | Co <sup>3+</sup>     | -          | 3.04 | -            | RuO <sub>2</sub>                    | 464.7      | 3.61 | 65.16        |
| RuO <sub>2</sub> /CoAl-LDH <sub>CP</sub> -110°C | Co <sup>2+</sup>     | 780.4      | 2.69 | 49.06        | RuO <sub>2</sub> ·xH <sub>2</sub> O | 462.5      | 3.42 | 32.83        |
|                                                 | Co <sup>3+</sup>     | -          | 3.04 | -            | RuO <sub>2</sub>                    | 464.7      | 3.61 | 67.17        |
| RuO <sub>2</sub> /CoAl-LDH <sub>CP</sub> -200°C | Co <sup>2+</sup>     | 781.0      | 2.69 | 15           | RuO <sub>2</sub> ·xH <sub>2</sub> O | 462.3      | 3.42 | 31.08        |
|                                                 | Co <sup>3+</sup>     | 779.2      | 3.04 | 64.83        | RuO <sub>2</sub>                    | 464.4      | 3.61 | 68.92        |
| RuO <sub>2</sub> /CoAl-LDH <sub>CP</sub> -300°C | Co <sup>2+</sup>     | 781.2      | 2.69 | 15.28        | RuO <sub>2</sub> ·xH <sub>2</sub> O | 462.0      | 3.42 | 23.65        |
|                                                 | Co <sup>3+</sup>     | 779.2      | 3.04 | 71.35        | RuO <sub>2</sub>                    | 464.3      | 3.61 | 76.35        |
| RuO <sub>2</sub> /CoAl-LDH <sub>CP</sub> -500°C | Co <sup>2+</sup>     | 781.2      | 2.69 | 16.10        | RuO <sub>2</sub> ·xH <sub>2</sub> O | 461.8      | 3.42 | 20.86        |
|                                                 | Co <sup>3+</sup>     | 779.2      | 3.04 | 74           | RuO <sub>2</sub>                    | 464.4      | 3.61 | 79.14        |

**Table S3.** The XPS Co 2p<sub>3/2</sub> results of of the fresh RuO<sub>2</sub>/CoAl-LDH<sub>CP</sub>-200°C and the used RuO<sub>2</sub>/CoAl-LDH<sub>CP</sub>-200°C

| Catalyst                                 | B. E. (eV)       |                  | Fraction (%)     |                  |
|------------------------------------------|------------------|------------------|------------------|------------------|
|                                          | Co <sup>2+</sup> | Co <sup>3+</sup> | Co <sup>2+</sup> | Co <sup>3+</sup> |
| RuO <sub>2</sub> /CoAl-LDH-200°C (fresh) | 781.0eV          | 779.3eV          | 15%              | 64.83%           |
| RuO <sub>2</sub> /CoAl-LDH-200°C (used)  | 780.8eV          | 779.2eV          | 28.42%           | 57.77%           |

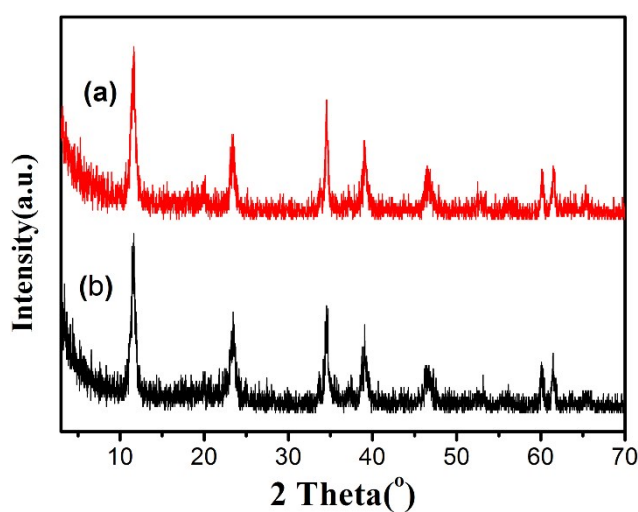**Fig. S3** XRD patterns of RuO<sub>2</sub>/CoAl-LDH<sub>CP</sub>-5% (a), RuO<sub>2</sub>/CoAl-LDH<sub>CP</sub>-7% (b)

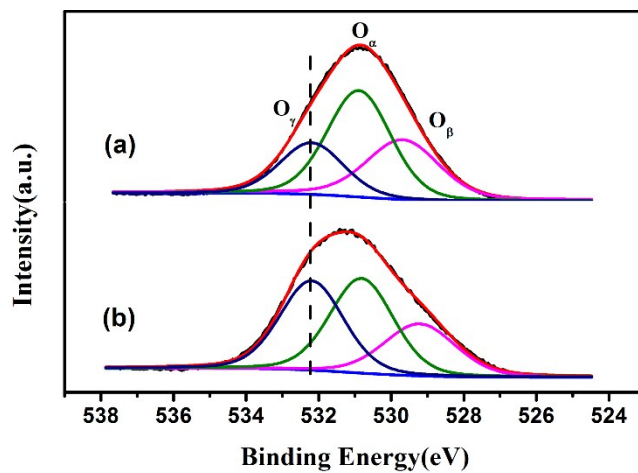

**Fig. S4** XPS spectra in O1s of the fresh RuO<sub>2</sub>/CoAl-LDH<sub>CP</sub>-200°C (a) and the used RuO<sub>2</sub>/CoAl-LDH<sub>CP</sub>-200°C (b).

**Table S4.** The XPS O1s results of of the fresh RuO<sub>2</sub>/CoAl-LDH<sub>CP</sub>-200°C and the used RuO<sub>2</sub>/CoAl-LDH<sub>CP</sub>-200°C

| Catalyst                                 | B. E. (eV)     |                |                | Fraction (%)   |                |                |
|------------------------------------------|----------------|----------------|----------------|----------------|----------------|----------------|
|                                          | O <sub>β</sub> | O <sub>α</sub> | O <sub>γ</sub> | O <sub>β</sub> | O <sub>α</sub> | O <sub>γ</sub> |
| RuO <sub>2</sub> /CoAl-LDH-200°C (fresh) | 529.7eV        | 530.9eV        | 532.2 eV       | 29.52          | 47.46          | 23.02          |
| RuO <sub>2</sub> /CoAl-LDH-200°C (used)  | 529.2eV        | 530.8eV        | 532.2eV        | 24.21          | 39.00          | 36.79          |
